# Supplementary material for: Schizophrenia polygenic risk score and type 2 diabetes onset in older adults with no schizophrenia diagnosis
Source: PubMed Central journal article supplement (PMC10501355; doi:10.1097/ypg.0000000000000349), 2023-07-04
Supplement: pg-33-191-s001.pdf [file pg-33-191-s001.pdf]

## Schizophrenia polygenic risk score and type 2 diabetes onset in older adults with no schizophrenia diagnosis.

Diana Shamsutdinova, MSc<sup>1</sup>, Olesya Ajnakina, PhD<sup>1,2</sup>, Angus Roberts, PhD<sup>1</sup>, Daniel Stahl, PhD<sup>1</sup>

### Supplementary materials

1. **Supplementary Table 1.** Characteristics of the ELSA participants included and excluded from the current analytical sample
2. **Supplementary Table 2.** Missing values at baseline
3. **Supplementary table 3.** Distribution of the variables before and after imputation
4. **Supplementary table 4.** Characteristics of participants with diagnosed (self-reported) and undiagnosed diabetes incidence
5. **Supplementary table 5.** Results of the complete cases analysis
6. **Supplementary Table 6.** Sensitivity analysis of introducing time-varying covariates and updating their values at the next medical follow-up
7. **Supplementary table 7.** Association of the T2DM at baseline and schizophrenia polygenic risk score. Results from the cross-sectional analysis using logistic regression and risk factors of the main study models
8. **Supplementary table 8.** Sensitivity analysis of changing the definition of the outcome to include diagnosed T2DM cases only compared to the main analysis which combined diagnosed and undiagnosed cases
9. **Supplementary table 9.** Power calculations

**Supplementary Table 1. Characteristics of the ELSA participants included and excluded from the current analytical sample.**

| Baseline characteristics                  | ELSA participants |                            |                            | Test statistics           |        |
|-------------------------------------------|-------------------|----------------------------|----------------------------|---------------------------|--------|
|                                           | N=13946           | Excluded<br>N=7978 (57.2%) | Included<br>N=5968 (42.8%) |                           |        |
|                                           | Mean (SD) / n (%) | Mean (SD) / n (%)          | Mean (SD) / n (%)          | t(df)/x <sup>2</sup> (df) | P      |
| <b>Age (years)</b>                        | 65.1(10.3)        | 65.3(11)                   | 64.9(9.2)                  | 1.96(13944)               | 0.0504 |
| <b>Gender</b>                             |                   |                            |                            |                           |        |
| Men                                       | 6351(45.5)        | 3676(46.1)                 | 2675(44.8)                 | 2.17(1)                   | 0.1411 |
| Women                                     | 7595(54.5)        | 4302(53.9)                 | 3293(55.2)                 |                           |        |
| <b>Relationship status</b>                |                   |                            |                            |                           |        |
| Not married                               | 4203(33.1)        | 2350(34.9)                 | 1853(31.0)                 | 385.84(1)                 | <0.001 |
| Married                                   | 8500(66.9)        | 4385(65.1)                 | 4115(69.0)                 |                           |        |
| <b>Body mass index (kg/m<sup>2</sup>)</b> | 28.1(5.1)         | 28.6(5.5)                  | 27.6(4.7)                  | 9.23(13944)               | <0.001 |
| <b>History of hypertension</b>            |                   |                            |                            |                           |        |
| No                                        | 7724(61.6)        | 3794(57.8)                 | 3930(65.9)                 | 85.69(1)                  | <0.001 |
| Yes                                       | 4808(38.4)        | 2770(42.2)                 | 2038(34.1)                 |                           |        |
| <b>History of cardiovascular disease</b>  |                   |                            |                            |                           |        |
| No                                        | 10461(83.5)       | 5288(80.6)                 | 5173(86.7)                 | 84.83(1)                  | <0.001 |
| Yes                                       | 2071(16.5)        | 1276(19.4)                 | 795(13.3)                  |                           |        |
| <b>Severe depressive symptom present</b>  |                   |                            |                            |                           |        |
| No                                        | 8401(84.7)        | 3218(81.5)                 | 5183(86.8)                 | 52.28(1)                  | <0.001 |
| Yes                                       | 1515(15.3)        | 730(18.5)                  | 785(13.2)                  |                           |        |
| <b>Accumulated wealth</b>                 |                   |                            |                            |                           |        |
| Low                                       | 4382(35.4)        | 2541(39.6)                 | 1841(30.8)                 | 120.43(2)                 | <0.001 |
| Intermediate                              | 4022(32.5)        | 2041(31.8)                 | 1981(33.2)                 |                           |        |
| High                                      | 3983(32.2)        | 1837(28.6)                 | 2146(36.0)                 |                           |        |
| <b>Education level</b>                    |                   |                            |                            |                           |        |
| Less than secondary                       | 4574 (40.8)       | 2714 (43.6)                | 1860(37.2)                 | 47.67(2)                  | <0.001 |
| Secondary                                 | 5028 (44.8)       | 2670 (42.9)                | 2358(47.2)                 |                           |        |
| Tertiary                                  | 1620 (14.4)       | 840 (13.5)                 | 780(15.6)                  |                           |        |
| <b>Smoking status</b>                     |                   |                            |                            |                           |        |
| Non-smoker                                | 10557(83.3)       | 5542(82.4)                 | 5015(84.4)                 | 8.74(1)                   | 0.0031 |
| Smoker                                    | 2112(16.7)        | 1183(17.6)                 | 929(15.6)                  |                           |        |
| <b>Exercise regime</b>                    |                   |                            |                            |                           |        |
| Light or none                             | 1197(9.6)         | 911(14.0)                  | 286(4.8)                   | 385.84(2)                 | <0.001 |
| Moderate                                  | 7799(62.5)        | 4090(62.9)                 | 3709(62.2)                 |                           |        |
| Vigorous                                  | 3475(27.9)        | 1503(23.1)                 | 1972(33)                   |                           |        |

*df, degrees of freedom; SD, standard deviation; P-p-value*

**Supplementary Table 2. Missing values at baseline**

| <i>Missing values</i>                           | <i>At baseline</i>                                         |
|-------------------------------------------------|------------------------------------------------------------|
| <i>Characteristic</i>                           | <i>Missing<br/>N (% , out of the total sample of 5968)</i> |
| <i>PGS-SZ</i>                                   | 0                                                          |
| <i>Age</i>                                      | 0                                                          |
| <i>Gender</i>                                   | 0                                                          |
| <i>Body mass index (kg/m2)</i>                  | 354 (5.9%)                                                 |
| <i>History of hypertension</i>                  | 0                                                          |
| <i>History of cardiovascular disease</i>        | 0                                                          |
| <i>Assessment of severe depressive symptoms</i> | 0                                                          |
| <i>History of stroke</i>                        | 0                                                          |
| <i>Triglycerides</i>                            | 396 (6.6%)                                                 |
| <i>HDL</i>                                      | 398 (6.7%)                                                 |
| <i>Exercise regime</i>                          | 1 (0.0%)                                                   |
| <i>Current smoking</i>                          | 24 (0.4%)                                                  |

**Supplementary table 3. Distribution of imputed variables before and after imputation**

| N of imputed set | Smoking<br>% yes | Exercise regime   |              |              | Triglyceride |      |                |              | HDL  |      |              |              |
|------------------|------------------|-------------------|--------------|--------------|--------------|------|----------------|--------------|------|------|--------------|--------------|
|                  |                  | Light or none (%) | moderate (%) | vigorous (%) | mean         | sd   | 0.25% quantile | 75% quantile | mean | sd   | 25% quantile | 75% quantile |
| 0                | 15.6%            | 4.8%              | 62.2%        | 33.1%        | 1.75         | 1.06 | 1.50           | 2.10         | 1.56 | 0.39 | 1.50         | 1.80         |
| 1                | 15.6%            | 4.8%              | 62.2%        | 33.0%        | 1.75         | 1.07 | 1.50           | 2.20         | 1.56 | 0.39 | 1.50         | 1.80         |
| 2                | 15.6%            | 4.8%              | 62.2%        | 33.1%        | 1.75         | 1.07 | 1.50           | 2.10         | 1.56 | 0.39 | 1.50         | 1.80         |
| 3                | 15.6%            | 4.8%              | 62.2%        | 33.0%        | 1.75         | 1.06 | 1.50           | 2.10         | 1.56 | 0.39 | 1.50         | 1.80         |
| 4                | 15.6%            | 4.8%              | 62.2%        | 33.1%        | 1.75         | 1.06 | 1.50           | 2.20         | 1.56 | 0.39 | 1.50         | 1.80         |
| 5                | 15.6%            | 4.8%              | 62.2%        | 33.0%        | 1.76         | 1.10 | 1.50           | 2.10         | 1.56 | 0.39 | 1.50         | 1.80         |
| 6                | 15.6%            | 4.8%              | 62.2%        | 33.0%        | 1.75         | 1.06 | 1.50           | 2.10         | 1.56 | 0.39 | 1.50         | 1.80         |
| 7                | 15.6%            | 4.8%              | 62.2%        | 33.0%        | 1.75         | 1.07 | 1.50           | 2.20         | 1.56 | 0.39 | 1.50         | 1.80         |
| 8                | 15.6%            | 4.8%              | 62.2%        | 33.0%        | 1.76         | 1.08 | 1.50           | 2.20         | 1.56 | 0.39 | 1.50         | 1.80         |
| 9                | 15.6%            | 4.8%              | 62.2%        | 33.0%        | 1.76         | 1.07 | 1.50           | 2.20         | 1.56 | 0.39 | 1.50         | 1.80         |
| 10               | 15.6%            | 4.8%              | 62.2%        | 33.0%        | 1.75         | 1.10 | 1.50           | 2.10         | 1.56 | 0.39 | 1.50         | 1.80         |
| 11               | 15.7%            | 4.8%              | 62.2%        | 33.1%        | 1.76         | 1.08 | 1.50           | 2.20         | 1.56 | 0.40 | 1.50         | 1.80         |
| 12               | 15.6%            | 4.8%              | 62.2%        | 33.0%        | 1.75         | 1.07 | 1.50           | 2.10         | 1.56 | 0.39 | 1.50         | 1.80         |
| 13               | 15.6%            | 4.8%              | 62.2%        | 33.0%        | 1.75         | 1.07 | 1.50           | 2.10         | 1.56 | 0.39 | 1.50         | 1.80         |
| 14               | 15.6%            | 4.8%              | 62.2%        | 33.0%        | 1.75         | 1.07 | 1.50           | 2.10         | 1.56 | 0.39 | 1.50         | 1.80         |
| 15               | 15.6%            | 4.8%              | 62.2%        | 33.0%        | 1.75         | 1.09 | 1.50           | 2.10         | 1.56 | 0.39 | 1.50         | 1.80         |
| 16               | 15.6%            | 4.8%              | 62.2%        | 33.0%        | 1.75         | 1.07 | 1.50           | 2.20         | 1.56 | 0.39 | 1.50         | 1.80         |
| 17               | 15.6%            | 4.8%              | 62.2%        | 33.0%        | 1.75         | 1.07 | 1.50           | 2.10         | 1.56 | 0.39 | 1.50         | 1.80         |
| 18               | 15.6%            | 4.8%              | 62.2%        | 33.1%        | 1.75         | 1.07 | 1.50           | 2.10         | 1.56 | 0.39 | 1.50         | 1.80         |
| 19               | 15.6%            | 4.8%              | 62.2%        | 33.0%        | 1.75         | 1.06 | 1.50           | 2.10         | 1.56 | 0.40 | 1.50         | 1.80         |
| 20               | 15.6%            | 4.8%              | 62.2%        | 33.0%        | 1.75         | 1.07 | 1.50           | 2.10         | 1.56 | 0.39 | 1.50         | 1.80         |

**Supplementary table 4. Characteristics of participants with diagnosed (self-reported) and undiagnosed diabetes incidence**

| Baseline characteristics             | T2DM incidences   | Diagnosed or Undiagnosed case |                              | Test statistics           |        |
|--------------------------------------|-------------------|-------------------------------|------------------------------|---------------------------|--------|
|                                      | N=493             | Diagnosed<br>N=379 (76.9%)    | Undiagnosed<br>N=114 (23.1%) |                           |        |
|                                      | Mean (SD) / n (%) | Mean (SD) / n (%)             | Mean (SD) / n (%)            | t(df)/x <sup>2</sup> (df) | P      |
| Length of follow-up, years           | 6.6(3)            | 6.6(3.1)                      | 10.2(2.5)                    | -11.27(491)               | <0.001 |
| Age (years)                          | 65.2(8.6)         | 64.8(8.6)                     | 66.7(8.7)                    | -2.03(491)                | 0.0425 |
| Gender                               |                   |                               |                              |                           |        |
| Men                                  | 244(49.5)         | 191(50.4)                     | 53(46.5)                     | 0.53(1)                   | 0.4647 |
| Women                                | 249(50.5)         | 188(49.6)                     | 61(53.5)                     |                           |        |
| Relationship status                  |                   |                               |                              |                           |        |
| not married                          | 150(30.4)         | 120(31.7)                     | 30(26.3)                     | 1.93(1)                   | 0.2770 |
| married                              | 343(69.6)         | 259(68.3)                     | 84(73.7)                     |                           |        |
| Body mass index (kg/m <sup>2</sup> ) | 30.8(5.3)         | 30.8(5.1)                     | 30.7(6)                      | 0.17(491)                 | 0.8676 |
| Stroke                               |                   |                               |                              |                           |        |
| No                                   | 471(95.5)         | 364(96)                       | 107(93.9)                    | 0.98(1)                   | 0.1573 |
| Yes                                  | 22(4.5)           | 15(4)                         | 7(6.1)                       |                           |        |
| History of hypertension              |                   |                               |                              |                           |        |
| No                                   | 234(47.5)         | 180(47.5)                     | 54(47.4)                     | <0.01(1)                  | 0.9810 |
| Yes                                  | 259(52.5)         | 199(52.5)                     | 60(52.6)                     |                           |        |
| History of cardiovascular disease    |                   |                               |                              |                           |        |
| No                                   | 424(86)           | 326(86)                       | 98(86)                       | <0.01(1)                  | 0.9890 |
| Yes                                  | 69(14)            | 53(14)                        | 16(14)                       |                           |        |
| Blood test                           |                   |                               |                              |                           |        |
| Triglycerides                        | 2.2(1.2)          | 2.3(1.2)                      | 2.0(1.0)                     | 1.96(491)                 | 0.0510 |
| HDL                                  | 1.4(0.3)          | 1.4(0.3)                      | 1.4(0.3)                     | -1.22(491)                | 0.2235 |
| Severe depressive symptom present    |                   |                               |                              |                           |        |
| No                                   | 404(81.9)         | 310(81.8)                     | 94(82.5)                     | 0.03(1)                   | 0.8720 |
| Yes                                  | 89(18.1)          | 69(18.2)                      | 20(17.5)                     |                           |        |
| Accumulated wealth                   |                   |                               |                              |                           |        |
| Low                                  | 200(40.6)         | 158(41.7)                     | 42(36.8)                     | 0.94(2)                   | 0.6249 |
| Intermediate                         | 163(33.1)         | 124(32.7)                     | 39(34.2)                     |                           |        |
| High                                 | 130(26.4)         | 97(25.6)                      | 33(28.9)                     |                           |        |
| Education level                      |                   |                               |                              |                           |        |
| Less than secondary                  | 188(44.5)         | 137(42.4)                     | 51(51.5)                     | 4.96(2)                   | 0.0838 |
| Secondary                            | 194(46.0)         | 158(48.9)                     | 36(36.4)                     |                           |        |
| Tertiary                             | 40(9.5)           | 28(8.7)                       | 12(12.1)                     |                           |        |
| Smoking status                       |                   |                               |                              |                           |        |
| Non-smoker                           | 388(79.2)         | 302(80.1)                     | 86(76.1)                     | 0.84(1)                   | 0.3583 |
| Smoker                               | 102(20.8)         | 75(19.9)                      | 27(23.9)                     |                           |        |
| Exercise regime                      |                   |                               |                              |                           |        |
| Light or none                        | 30(6.1)           | 23(6.1)                       | 7(6.1)                       | 1.93(2)                   | 0.3817 |
| Moderate                             | 344(69.8)         | 259(68.3)                     | 85(74.6)                     |                           |        |
| Vigorous                             | 119(24.1)         | 97(25.6)                      | 22(19.3)                     |                           |        |

**Supplementary table 5. Results of the complete cases analysis**

Results of the main analyses using records of participants with no missing data required for each of the models. Model 1 was based on the sample of 5968 individuals (there were no missing data in Model A's covariates), Model 2 - 4459 (74.7% of the main analytical sample).

| Estimated hazard ratios                   | Model 1              | Model 1a              | Model 1b              | Model 1c              | Model 2               |
|-------------------------------------------|----------------------|-----------------------|-----------------------|-----------------------|-----------------------|
|                                           | HR (95%CI)           | HR (95%CI)            | HR (95%CI)            | HR (95%CI)            | HR (95%CI)            |
| <i>PGS-SZ (per 1 sd)</i>                  | 1.010(0.905,1.128)   | 1.018(0.958,1.082)    | 1.017(0.922,1.122)    | 1.008(0.904,1.124)    | 1.024(0.903,1.161)    |
| <i>Age (per 10y)</i>                      | 1.164(1.08,1.254)*** | 1.235(1.085,1.407)**  | 1.272(1.161,1.393)*** | 1.215(1.064,1.387)**  | 1.24(1.1,1.397)***    |
| <i>Gender_women</i>                       | 0.798(0.663,0.961)*  | 0.853(0.695,1.046)    | 0.815(0.626,1.06)     | 0.773(0.603,0.990)*   | 0.753(0.602,0.943)*   |
| <i>BMI (per 5kg/m2)</i>                   |                      | 1.618(1.425,1.838)*** | 1.633(1.522,1.753)*** | 1.626(1.494,1.769)*** | 1.630(1.468,1.811)*** |
| <i>History of hypertension</i>            |                      | 1.594(1.311,1.938)*** | 1.603(1.348,1.906)*** | 1.589(1.294,1.95)***  | 1.540(1.226,1.935)*** |
| <i>History of CVD</i>                     |                      | 1.082(0.846,1.384)    | 1.051(0.815,1.356)    | 1.032(0.658,1.619)    | 1.020(0.736,1.414)    |
| <i>Present severe depressive symptoms</i> |                      | 1.491(1.177,1.89)***  | 1.405(1.072,1.841)*   | 1.344(1.047,1.725)*   | 1.353(1.05,1.743)*    |
| <i>Triglycerides (mmol/l)</i>             |                      | 1.175(1.097,1.258)*** | 1.157(1.08,1.24)***   | 1.149(1.07,1.234)***  | 1.147(1.079,1.220)*** |
| <i>HDL Cholesterol (mmol/l)</i>           |                      | 0.548(0.379,0.793)**  | 0.578(0.368,0.906)*   | 0.539(0.367,0.791)**  | 0.568(0.372,0.869)**  |
| <i>History of stroke</i>                  |                      | 1.720(1.12,2.641)*    | 1.538(1.081,2.187)*   | 1.631(0.902,2.948)    | 1.649(0.995,2.735)    |
| <i>Current smoking</i>                    |                      |                       | 1.642(1.33,2.028)***  | 1.559(1.108,2.195)*   | 1.493(1.068,2.086)*   |
| <i>Exercise_light</i>                     |                      |                       | 1.049(0.673,1.636)    | 1.064(0.537,2.108)    | 1.026(0.647,1.627)    |
| <i>Exercise_vigorous</i>                  |                      |                       | 0.809(0.645,1.014)    | 0.881(0.73,1.063)     | 0.877(0.731,1.051)    |
| <i>Education_level_low</i>                |                      |                       |                       | 1.556(1.072,2.260)*   | 1.481(1.022,2.146)*   |
| <i>Education_level_medium</i>             |                      |                       |                       | 1.343(0.914,1.973)    | 1.282(0.903,1.819)    |
| <i>Wealth_medium</i>                      |                      |                       |                       | 1.003(0.751,1.338)    | 0.991(0.745,1.317)    |
| <i>Wealth_low</i>                         |                      |                       |                       | 1.091(0.743,1.603)    | 1.073(0.784,1.469)    |
| <i>PGS-T2DM (per 1 sd)</i>                |                      |                       |                       |                       | 1.303(1.151,1.475)*** |

\*\*\* for p-value <0.001, \*\* for p-value <0.01 and above 0.0001, \* for p-value <0.05 and above 0.01

**Key:** All models are semi-parametric proportionate hazard models with interval censoring implemented in the IcenReg R package.

Model 1 included age, gender, and schizophrenia polygenic score.

Models 1a, 1b, and 1c added physical health, lifestyle factors, and socioeconomic variables in a stepwise manner.

Finally, Model 2 included age, gender, and schizophrenia polygenic score (with 4 genetic principal components to adjust for ancestry), and BMI, history of hypertension, history of cardiovascular disease, history of stroke, present depression, baseline blood triglycerides and HDL cholesterol levels (mmol/l); and current smoking(yes/no), exercise (light/moderate/vigorous; baseline level = moderate); accumulated wealth (low/medium/high; baseline level is "high"), education (low/medium/high, baseline level is "high"), polygenic score for T2DM.

**Supplementary Table 6. Sensitivity analysis of introducing time-varying covariates and updating their values at the next medical follow-up**

We compared IcenReg semi-parametric proportionate hazards model accounting for interval censoring but not for time-varying covariates, corresponding Cox model assuming the time of event in the middle of the interval, and Cox model accounting for the time-varying covariates.

| Estimated hazard ratios for Model E | Interval censoring                                      | Cox model                                               | Cox model                                                                              |
|-------------------------------------|---------------------------------------------------------|---------------------------------------------------------|----------------------------------------------------------------------------------------|
|                                     | time-invariant covariates (baseline only)<br>HR (95%CI) | time-invariant covariates (baseline only)<br>HR (95%CI) | time-varying covariates (baseline and updated at the next medical visit)<br>HR (95%CI) |
| PGS-SZ (per 1 sd)                   | 1.037(0.933,1.152)                                      | 1.034(0.935,1.144)                                      | 1.033(0.938,1.137)                                                                     |
| Age (per 10y)                       | 1.21(1.067,1.373)**                                     | 1.229(1.09,1.386)***                                    | 1.302(1.149,1.474)***                                                                  |
| Gender_women                        | 0.763(0.586,0.993)*                                     | 0.741(0.57,0.963)*                                      | 0.787(0.617,1.005)                                                                     |
| BMI (per 5kg/m2)                    | 1.572(1.381,1.789)***                                   | 1.598(1.415,1.804)***                                   | 1.505(1.357,1.67)***                                                                   |
| History of hypertension             | 1.632(1.348,1.976)***                                   | 1.677(1.367,2.057)***                                   | 1.406(1.153,1.714)***                                                                  |
| History of CVD                      | 0.994(0.721,1.372)                                      | 0.998(0.755,1.32)                                       | 0.763(0.574,1.015)                                                                     |
| Present severe depressive symptoms  | 1.352(0.996,1.834)                                      | 1.384(1.051,1.822)*                                     | 1.409(1.082,1.834)*                                                                    |
| Triglycerides (mmol/l)              | 1.112(1.04,1.189)**                                     | 1.115(1.049,1.184)***                                   | 1.177(1.091,1.27)***                                                                   |
| HDL Cholesterol (mmol/l)            | 0.628(0.385,1.025)                                      | 0.623(0.391,0.991)*                                     | 0.537(0.349,0.826)**                                                                   |
| History of stroke                   | 1.499(0.972,2.312)                                      | 1.555(0.967,2.502)                                      | 1.119(0.699,1.789)                                                                     |
| Current smoking                     | 1.428(1.095,1.864)**                                    | 1.484(1.155,1.908)**                                    | 1.862(1.428,2.427)***                                                                  |
| Exercise_light                      | 0.937(0.606,1.451)                                      | 0.967(0.64,1.463)                                       | 0.671(0.43,1.047)                                                                      |
| Exercise_vigorous                   | 0.789(0.602,1.036)                                      | 0.776(0.599,1.005)                                      | 0.821(0.648,1.04)                                                                      |
| Education level_low                 | 1.448(0.997,2.102)                                      | 1.467(0.995,2.163)                                      | 1.324(0.826,2.122)                                                                     |
| Education level_medium              | 1.342(0.94,1.918)                                       | 1.352(0.93,1.965)                                       | 1.218(0.776,1.913)                                                                     |
| Wealth_medium                       | 1.021(0.769,1.354)                                      | 1.018(0.77,1.345)                                       | 1.087(0.835,1.414)                                                                     |
| Wealth_low                          | 1.172(0.894,1.537)                                      | 1.193(0.915,1.555)                                      | 1.268(0.958,1.677)                                                                     |
| PGS-T2DM (per 1 sd)                 | 1.335(1.214,1.467)***                                   | 1.357(1.235,1.490)***                                   | 1.34(1.214,1.479)***                                                                   |

**Supplementary table 7. Association of the T2DM at baseline and schizophrenia polygenic risk score. Results from the cross-sectional analysis using logistic regression and risk factors of the study models**

|                            | <b>Model 1</b> | <b>Model 2</b> |
|----------------------------|----------------|----------------|
| <b>Odds Ratio estimate</b> | <b>1.0021</b>  | <b>1.0042</b>  |
| <b>p-value</b>             | <b>0.5211</b>  | <b>0.2522</b>  |

The sample for this analysis contained individuals with complete data for the underlying risk factors used in each of the model.

Model 1: age, gender, and schizophrenia polygenic score (with 4 genetic principal components to adjust for ancestry).

Model 2: age, gender, and schizophrenia polygenic score (with 4 genetic principal components to adjust for ancestry), and BMI, history of hypertension, history of cardiovascular disease, history of stroke, present depression, baseline blood triglycerides and HDL cholesterol levels (mmol/l); and current smoking(yes/no), exercise (light/moderate/vigorous; baseline level = moderate); accumulated wealth (low/medium/high; baseline level is "high"), education (low/medium/high, baseline level is "high"), polygenic score for T2DM.

**Results: We did not observe a statistically significant association between the T2DM diagnosis at the baseline and polygenic risk score for schizophrenia.**



**Supplementary table 8. Sensitivity analysis of changing the definition of the outcome to include diagnosed T2DM cases only compared to the main analysis which combined diagnosed and undiagnosed cases**

Results for the most inclusive model (Model E) which comprised the full list of the covariates used in the study.

| <i>Estimated hazard ratios</i>            | <i>Definition of the outcome</i> |                                        |
|-------------------------------------------|----------------------------------|----------------------------------------|
|                                           | <i>Diagnosed cases only</i>      | <i>Diagnosed and undiagnosed cases</i> |
|                                           | <i>Model E, HR (95%CI)</i>       | <i>Model E, HR (95%CI)</i>             |
| <i>PGS-SZ (per 1 sd)</i>                  | <b>1.055(0.945,1.178)</b>        | <b>1.037(0.933,1.152)</b>              |
| <i>Age (per 10y)</i>                      | 1.152(0.995,1.334)               | 1.210(1.067,1.373)**                   |
| <i>Gender_women</i>                       | 0.772(0.592,1.006)               | 0.763(0.586,0.993)*                    |
| <i>BMI (per 5kg/m2)</i>                   | 1.535(1.367,1.724)***            | 1.572(1.381,1.789)***                  |
| <i>History of hypertension</i>            | 1.623(1.291,2.040)***            | 1.632(1.348,1.976)***                  |
| <i>History of CVD</i>                     | 0.982(0.691,1.395)               | 0.994(0.721,1.372)                     |
| <i>Present severe depressive symptoms</i> | 1.361(1.001,1.851)*              | 1.352(0.996,1.834)                     |
| <i>Triglycerides (mmol/l)</i>             | 1.119(1.035,1.209)**             | 1.112(1.040,1.189)**                   |
| <i>HDL Cholesterol (mmol/l)</i>           | 0.565(0.345,0.927)*              | 0.628(0.385,1.025)                     |
| <i>History of stroke</i>                  | 1.317(0.769,2.256)               | 1.499(0.972,2.312)                     |
| <i>Current smoking</i>                    | 1.267(0.919,1.748)               | 1.428(1.095,1.864)**                   |
| <i>Exercise_light</i>                     | 0.981(0.602,1.599)               | 0.937(0.606,1.451)                     |
| <i>Exercise_vigorous</i>                  | 0.855(0.654,1.118)               | 0.789(0.602,1.036)                     |
| <i>Education level_low</i>                | 1.387(0.719,2.674)               | 1.448(0.997,2.102)                     |
| <i>Education level_medium</i>             | 1.424(0.786,2.578)               | 1.342(0.94,1.918)                      |
| <i>Wealth_medium</i>                      | 1.077(0.782,1.483)               | 1.021(0.769,1.354)                     |
| <i>Wealth_low</i>                         | 1.333(0.98,1.814)                | 1.172(0.894,1.537)                     |
| <i>PGS-T2DM (per 1 sd)</i>                | 1.329(1.187,1.488)***            | 1.335(1.214,1.467)***                  |

\*\*\* for p-value <0.001, \*\* for p-value <0.01 and above 0.0001, \* for p-value <0.05 and above 0.01

## Supplementary table 9. Power calculations

Sample size required to find the effect statistically significant with probability 80%, using the definition of a statistically significant level at p-value < 0.05

| Estimated hazard ratio | Required sample size, Model A | Required sample size, Model E |
|------------------------|-------------------------------|-------------------------------|
| 1.05                   | 37987                         | 38222                         |
| 1.06                   | 26380                         | 26543                         |
| 1.07                   | 19381                         | 19501                         |
| 1.08                   | 14839                         | 14931                         |
| 1.09                   | 11725                         | 11797                         |
| 1.105                  | 9497                          | 9556                          |
| 1.12                   | 7849                          | 7897                          |
| 1.13                   | 6595                          | 6636                          |
| <b>1.14</b>            | <b>5620</b>                   | <b>5655</b>                   |
| 1.15                   | 4846                          | 4876                          |
| 1.16                   | 4221                          | 4247                          |
| 1.22                   | 2375                          | 2389                          |
| 1.65                   | 380                           | 383                           |
| 2.72                   | 95                            | 96                            |

Using R package "powerSurvEpi", function ssizeEpiCont

### R code

```
size_for_effectsize = function(df0, exposure = "sz20_", modelcov = covE, effectsizes = c(0.1,0.125, 0.15,0.2,0.5,1)){
  list_na = vector(mode = "double")
  for (i in seq(length(effectsizes))) {
    n = ssizeEpiCont(formula = as.formula(paste(exposure, "~", paste(modelcov, collapse = "+"), sep = "")),
      dat = df0, var.X1 = exposure, var.failureFlag = 'outcome_d', power = 0.80,
      theta = exp(effectsizes[i]), alpha = 0.05)["n"]
    list_na[i] = n }
  res = data.frame(estimated_effectsize = effectsizes, exp_effectsize = exp(effectsizes), n = unlist(list_na))
  return(res)
}
effectsizes = c(0.05, 0.06,0.07,0.08, 0.09, 0.1,0.11,0.12,0.13,0.14, 0.145,0.15,0.2,0.5,1)
size_for_effectsize(df, "sz20_", model_a_0, effectsizes)
size_for_effectsize(df, "sz20_", model_d_0, effectsizes)
```

**Conclusion: in our analytical sample (N=5968) an association with the hazard ratio of 1.14/1 sd or above can be detected with probability 80% using the alpha level (p-value threshold) 0.05.**

***Supplementary table 10. Further analysis of the included and excluded participants into the analytical cohort of the study out of all ELSA participants.***

In the Supplementary Table 1 we have compared the cohort of people in the final analytical sample (“included” group) versus all the rest (“excluded” group) for our analytical cohort. So, the “excluded” group contained prevalent T2DM cases that were excluded from our time-to-event analysis of the incident cases, along with the participants who they did not opt in for the genotype testing. The excluded group then had a disproportionately large number of people with T2DM at the baseline, which resulted in higher prevalence of T2DM related risk factors. To check the potential selection bias and loss of statistical power, it can be better to compare the initial cohorts, that is, the participants with the genetic data, and without. Those are less dissimilar, but there is still a higher share of people with hypertension, cardiovascular diseases, and depressive symptoms (“ELSA Participants, ALL” sub-table below).

We have further compared the in/out cohorts within the same wealth categories (“ELSA Participants, Low/Medium/High Wealth” sub-tables below). The differences in BMI, depressive symptoms, marriage status, age (in low and medium wealth groups), and smoking cease to be statistically significant. Hypertension prevalence stays elevated in the excluded group (in medium and high wealth), as well as the cardiovascular diseases (in all wealth categories), although we note that a prior cardiovascular disease were not significant in our fully stratified model.

The presented stratified comparisons show that the cohort differences are substantially lower once stratified by wealth, and therefore, these differences should have had a limited impact on our results, especially in the fully adjusted models.

| <i>ELSA Participants, ALL</i>          | <i>Excluded from the analyses*</i> | <i>Included in the analyses*</i> | <i>All</i> | <i>p-value</i> | <i>t(df)/x<sup>2</sup>(df)</i> |
|----------------------------------------|------------------------------------|----------------------------------|------------|----------------|--------------------------------|
| <i>Sex ( % female)</i>                 | 55.13%                             | 53.82%                           | 54.46%     | 0.12058        | 2.41                           |
| <i>Hypertension (% yes)</i>            | 40.54%                             | 36.72%                           | 38.37%     | 0.00001        | 19.04                          |
| <i>Depressive symptoms (% yes)</i>     | 18.93%                             | 13.70%                           | 15.28%     | 0              | 44.11                          |
| <i>Cardiovascular diseases (% yes)</i> | 19.04%                             | 14.62%                           | 16.53%     | 0              | 43.49                          |
| <i>Smoking (% yes)</i>                 | 17.54%                             | 15.99%                           | 16.67%     | 0.02082        | 5.34                           |
| <i>Wealth (% high)</i>                 | 29.63%                             | 34.86%                           | 32.60%     | 0              | 38.58                          |
| <i>Physical activity (% high)</i>      | 23.67%                             | 31.00%                           | 27.86%     | 0              | 251.46                         |
| <i>Married (% yes)</i>                 | 64.74%                             | 15.55%                           | 23.06%     | 0              | 21.17                          |
| <i>Body mass index (mean)</i>          | 28.35                              | 27.91                            | 28.06      | 0.00003        | 4.18                           |
| <i>Age (mean)</i>                      | 64.94                              | 65.3                             | 65.12      | 0.03602        | -2.1                           |
| <i>Years of Education (mean)</i>       | 13.42                              | 14                               | 13.75      | 0              | -8.08                          |

| <i>ELSA Participants, Low Wealth</i> | <i>Excluded*</i> | <i>Included*</i> | <i>All</i> | <i>p_value</i> | <i>test statistic</i> |
|--------------------------------------|------------------|------------------|------------|----------------|-----------------------|
| <i>Sex (female)</i>                  | 58.0%            | 57.1%            | 57.5%      | 0.5183         | 0.42                  |
| <i>Hypertention (yes)</i>            | 45.5%            | 43.3%            | 44.3%      | 0.1340         | 2.25                  |
| <i>Depression (yes)</i>              | 26.4%            | 20.7%            | 22.6%      | 0              | 14.85                 |
| <i>Cardiovascular diseases (yes)</i> | 23.9%            | 18.0%            | 20.6%      | 0              | 23.26                 |
| <i>Smoking (yes)</i>                 | 23.5%            | 25.9%            | 24.8%      | 0.0701         | 3.28                  |
| <i>Wealth (high)</i>                 | <b>low</b>       | <b>low</b>       | <b>low</b> |                |                       |
| <i>Physical activity (high)</i>      | 14.7%            | 19.7%            | 17.5%      | 0              | 107.19                |
| <i>Married (yes)</i>                 | 48.6%            | 99.6%            | 99.8%      | 0.1392         | 2.19                  |
| <i>Body mass index</i>               | 28.8             | 28.6             | 28.7       | 0.2405         | 1.17                  |
| <i>Age</i>                           | 67.0             | 66.4             | 66.7       | 0.0619         | 1.87                  |
| <i>Years of Education</i>            | 12.0             | 12.3             | 12.2       | 0              | -3.62                 |

| <i>ELSA Participants, Medium Wealth</i> | <i>Excluded*</i> | <i>Included*</i> | <i>All</i>    | <i>p_value</i> | <i>test statistic</i> |
|-----------------------------------------|------------------|------------------|---------------|----------------|-----------------------|
| <i>Sex (female)</i>                     | 55.9%            | 54.0%            | 54.8%         | 0.2405         | 1.38                  |
| <i>Hypertention (yes)</i>               | 41.3%            | 37.3%            | 39.1%         | 0.0123         | 6.27                  |
| <i>Depression (yes)</i>                 | 14.6%            | 13.0%            | 13.5%         | 0.2556         | 1.29                  |
| <i>Cardiovascular diseases (yes)</i>    | 18.0%            | 14.4%            | 16.0%         | 0.0030         | 8.78                  |
| <i>Smoking (yes)</i>                    | 15.3%            | 13.8%            | 14.4%         | 0.1887         | 1.73                  |
| <i>Wealth (high)</i>                    | <b>medium</b>    | <b>medium</b>    | <b>medium</b> |                |                       |
| <i>Physical activity (high)</i>         | 23.7%            | 31.1%            | 27.9%         | 0              | 63.30                 |
| <i>Married (yes)</i>                    | 71.3%            | 99.1%            | 99.7%         | 0.7165         | 0.13                  |
| <i>Body mass index</i>                  | 28.4             | 28.1             | 28.2          | 0.0851         | 1.72                  |
| <i>Age</i>                              | 64.9             | 65.4             | 65.1          | 0.1325         | -1.50                 |
| <i>Years of Education</i>               | 13.4             | 13.8             | 13.6          | 0              | -3.43                 |

| <i>ELSA Participants, High Wealth</i> | <i>Excluded*</i> | <i>Included*</i> | <i>All</i>  | <i>p_value</i> | <i>test statistic</i> |
|---------------------------------------|------------------|------------------|-------------|----------------|-----------------------|
| <i>Sex (female)</i>                   | 52.9%            | 50.6%            | 51.5%       | 0.1580         | 1.99                  |
| <i>Hypertention (yes)</i>             | 34.6%            | 30.4%            | 32.0%       | 0.0063         | 7.46                  |
| <i>Depression (yes)</i>               | 10.2%            | 7.8%             | 8.4%        | 0.0398         | 4.23                  |
| <i>Cardiovascular diseases (yes)</i>  | 14.2%            | 12.1%            | 12.9%       | 0.0472         | 3.94                  |
| <i>Smoking (yes)</i>                  | 9.1%             | 8.2%             | 8.5%        | 0.2763         | 1.19                  |
| <i>Wealth</i>                         | <b>high</b>      | <b>high</b>      | <b>high</b> |                |                       |
| <i>Physical activity (high)</i>       | 35.7%            | 41.6%            | 39.4%       | 0              | 37.25                 |
| <i>Married (yes)</i>                  | 81.6%            | 2.9%             | 4.2%        | 0.5308         | 0.39                  |
| <i>Body mass index</i>                | 27.6             | 27.0             | 27.2        | 0.0020         | 3.09                  |
| <i>Age</i>                            | 62.6             | 64.5             | 63.7        | 0              | -6.70                 |
| <i>Years of Education</i>             | 15.6             | 15.8             | 15.7        | 0.1516         | -1.43                 |

\* Included cohort is the initial cohort selected for the analyses before exclusion of the prevalent diabetes cases. Excluded are all the rest, that is, those, for whom there is no genetic information.
